# Supplementary material for: Modelling the aerosol chemical composition of the tropopause overthe Tibetan Plateau during the Asian summer monsoon
Source: Copernicus journal article supplement (doi:10.5194/acp-2019-412), 2019-05-06
Supplement: Supplementary file 1 [file acp-2019-412-supplement.pdf]

*Supplement of*

**Modelling the aerosol chemical composition of the tropopause over the Tibetan Plateau during the Asian summer monsoon**

**Jianzhong Ma et al.**

*Correspondence to:* Jianzhong Ma (majz@cma.gov.cn)

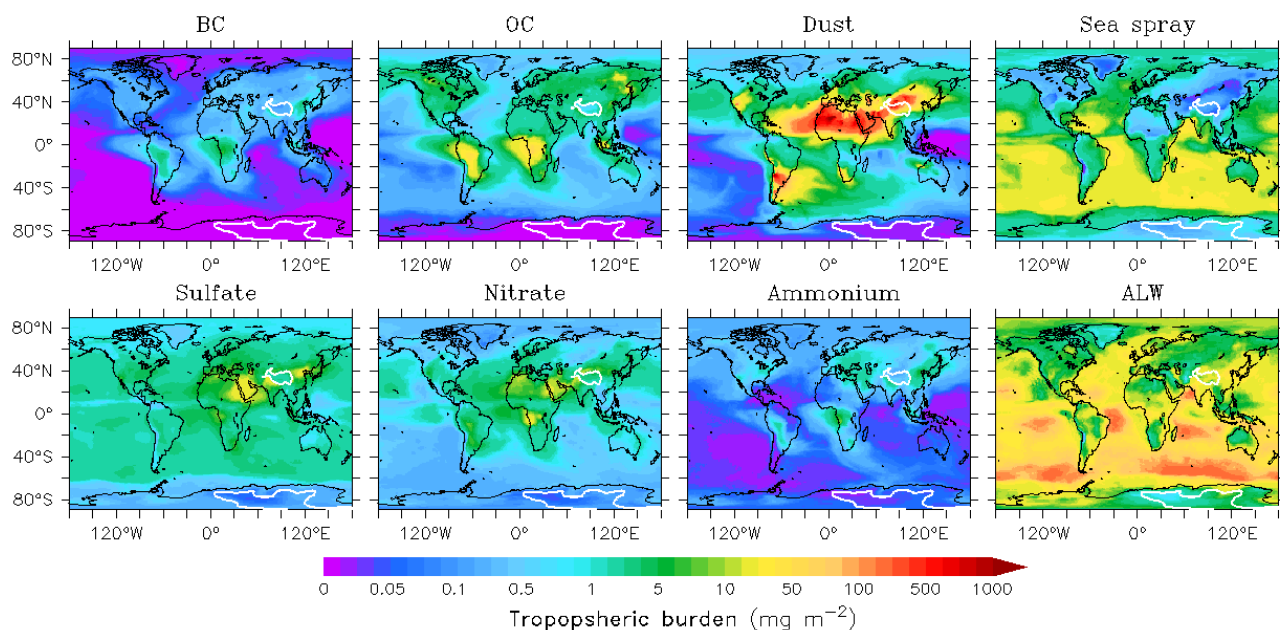

**Figure S1.** Same as Fig. 3, but for the year 2010.

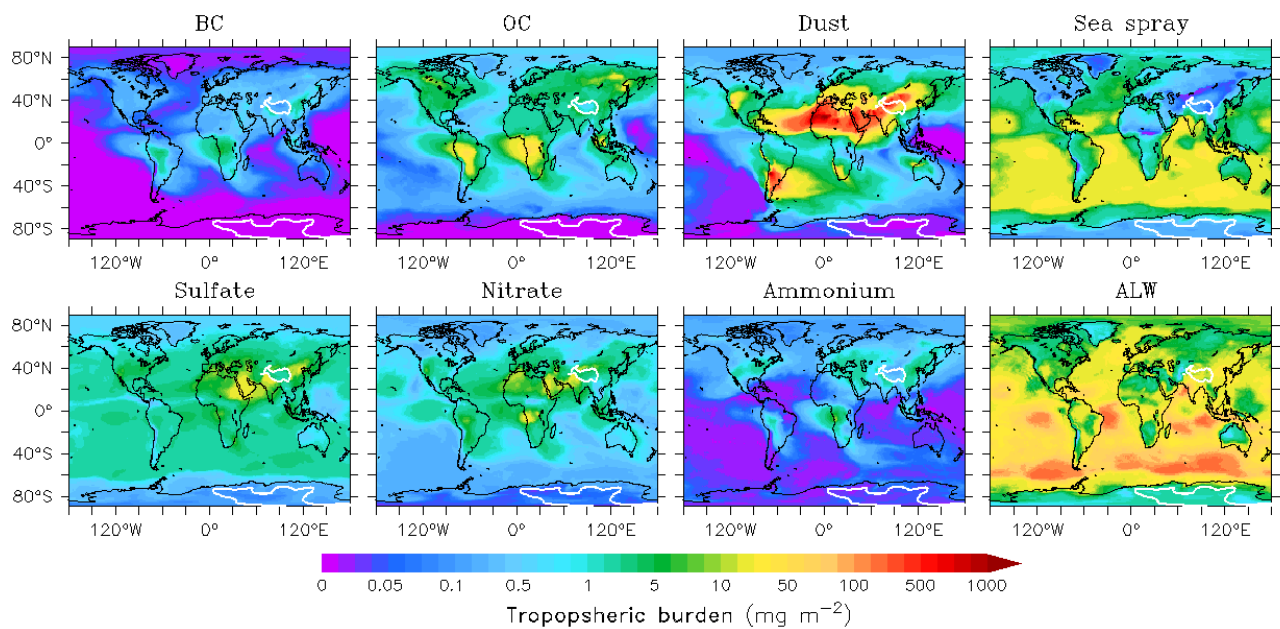

**Figure S2.** Same as Fig. 3, but for the year 2012.

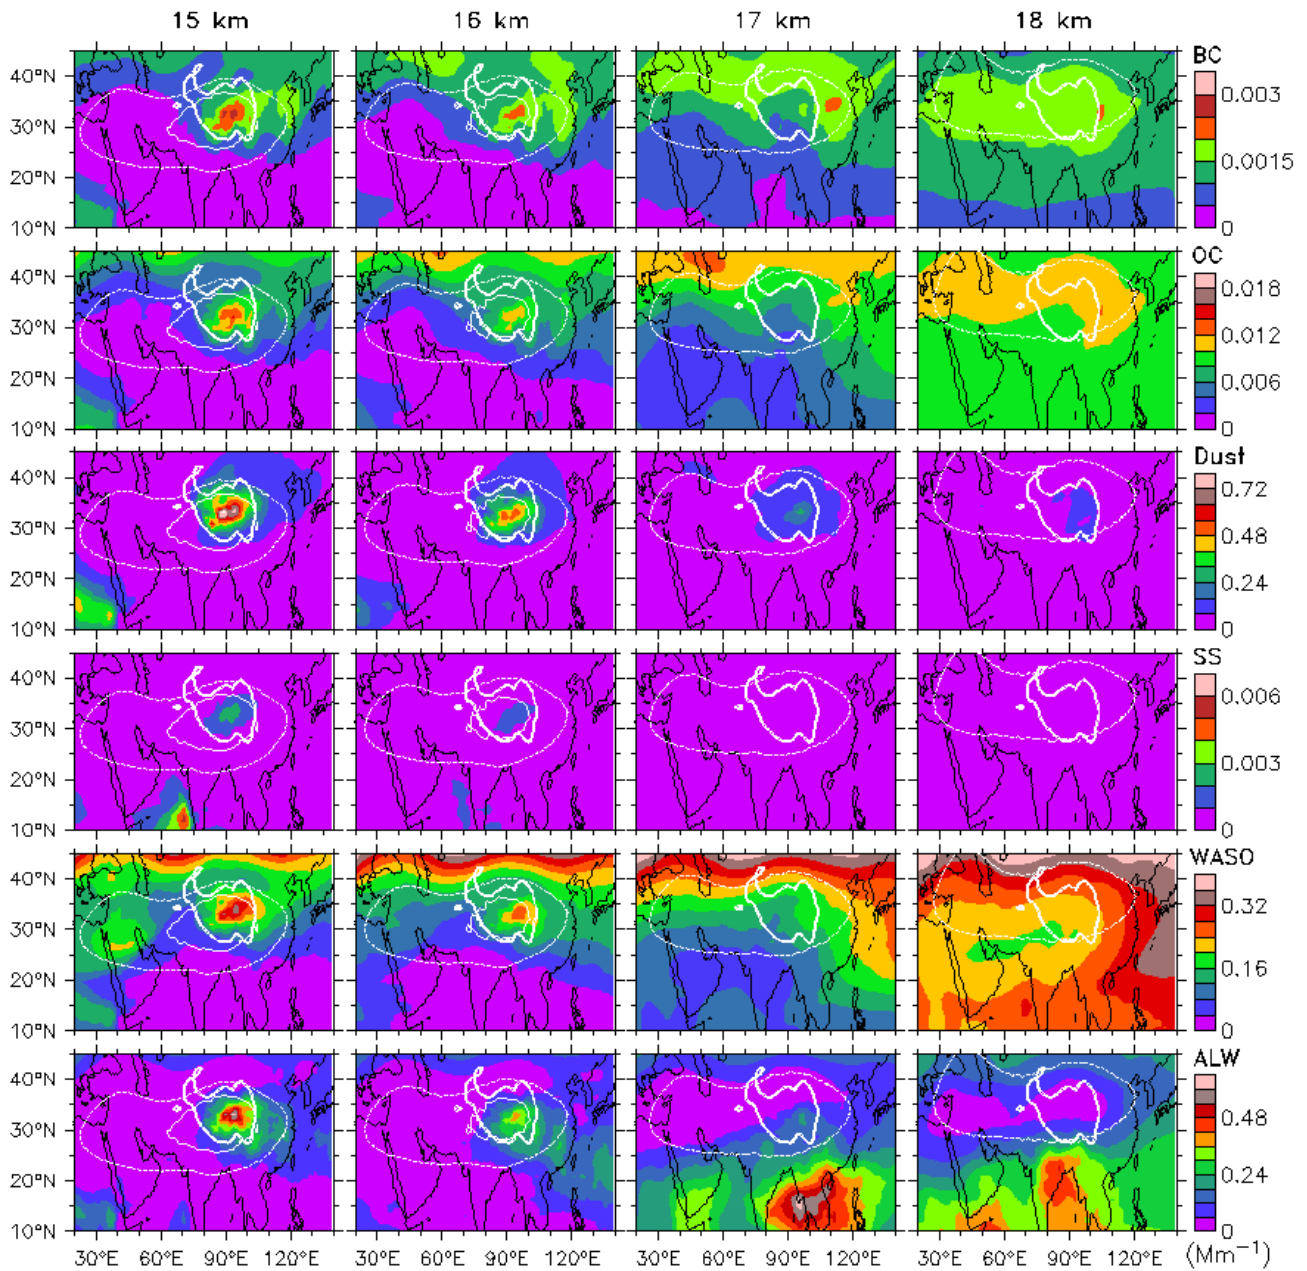

**Figure S3.** EMAC simulated aerosol extinction coefficients,  $K_e$ , in units of  $\text{Mm}^{-1}$ , attributed to BC, OC, dust, sea spray (SS), WASO (i.e.,  $\text{SO}_4^{2-}$ ,  $\text{NO}_3^-$  and  $\text{NH}_4^+$  ions) and ALW (**first to sixth row**), at altitudes of 15, 16, 17 and 18 km (**first to fourth column**), averaged for July–August 2010. Thin white lines indicate the anticyclone area, with the same index as used in Fig. 2, and thick white lines highlight the Tibetan Plateau area.

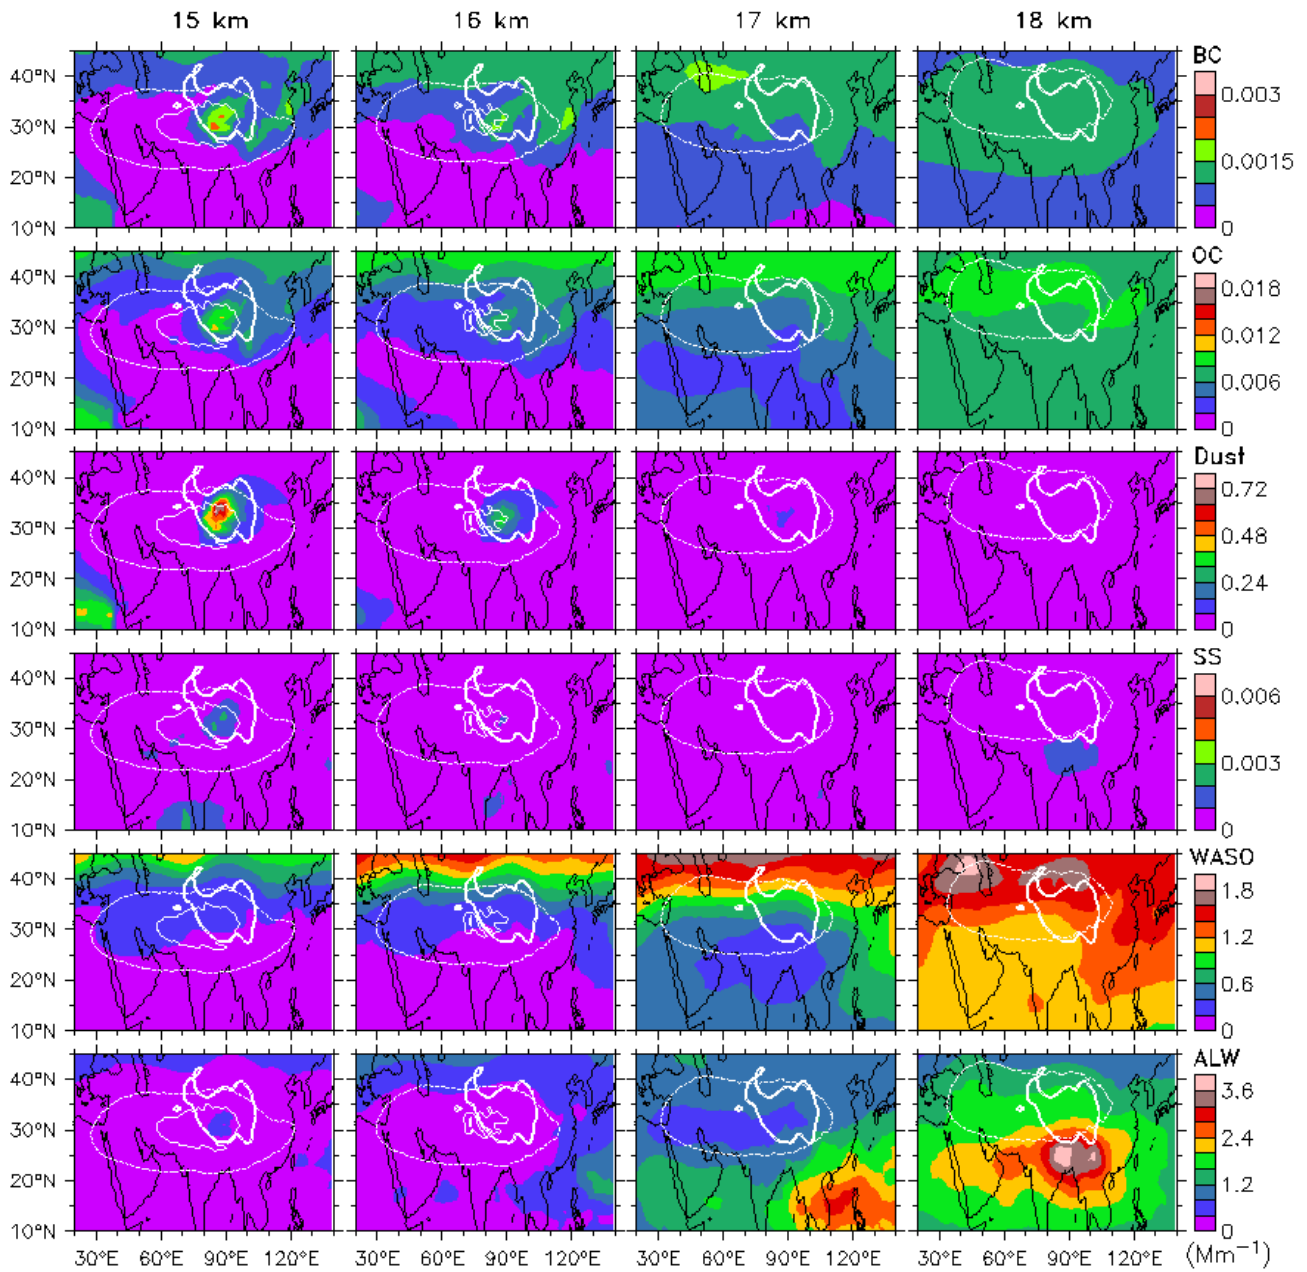

**Figure S4.** Same as Fig. S3, but for the year 2011.

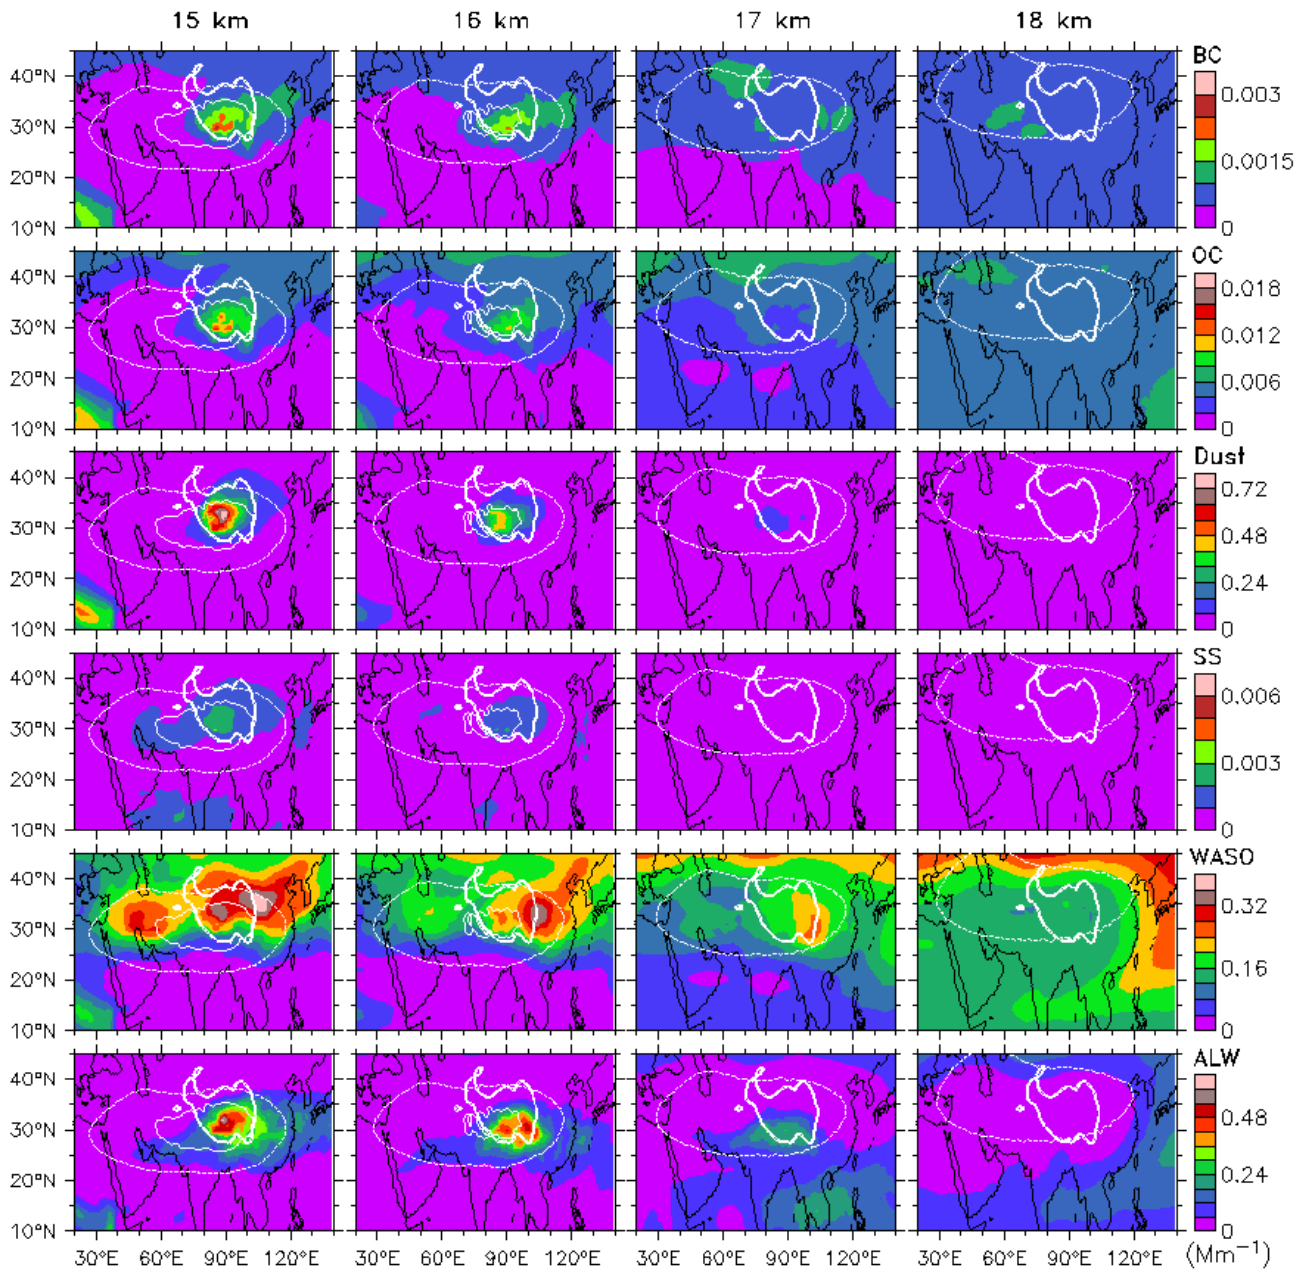

Figure S5. Same as Fig. S3, but for the year 2012.

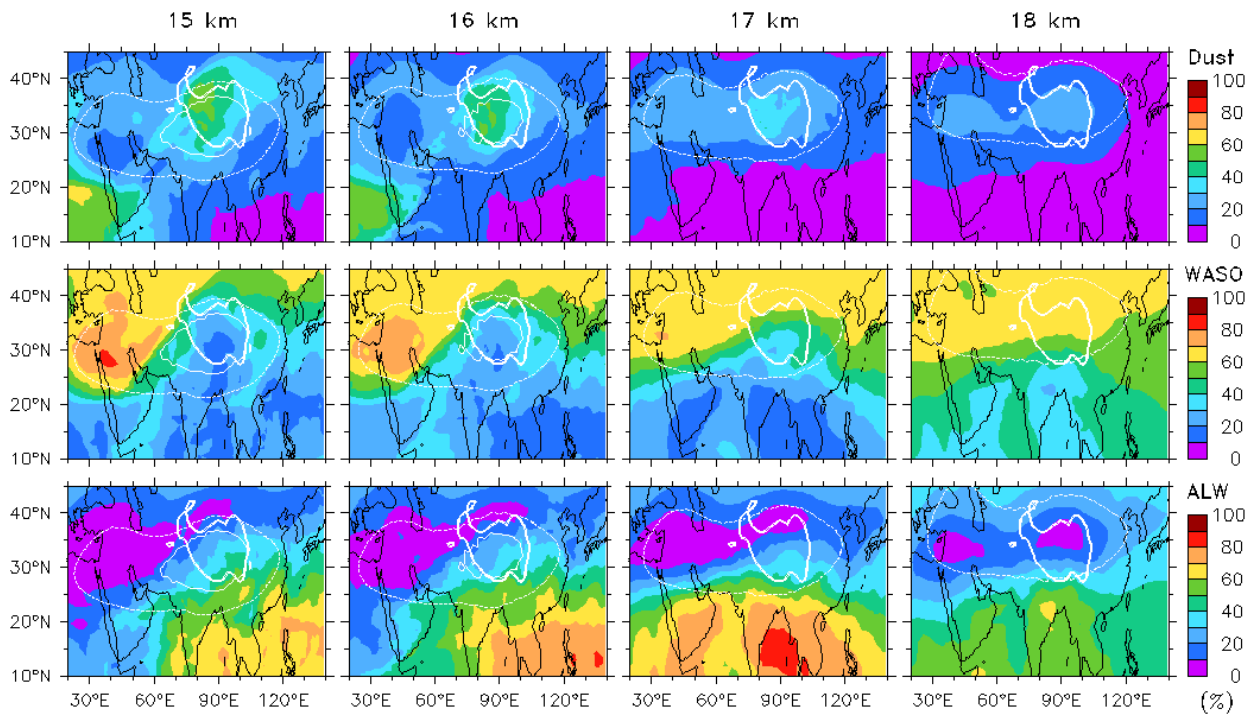

**Figure S6.** Same as Fig. 6, but for the year 2010.

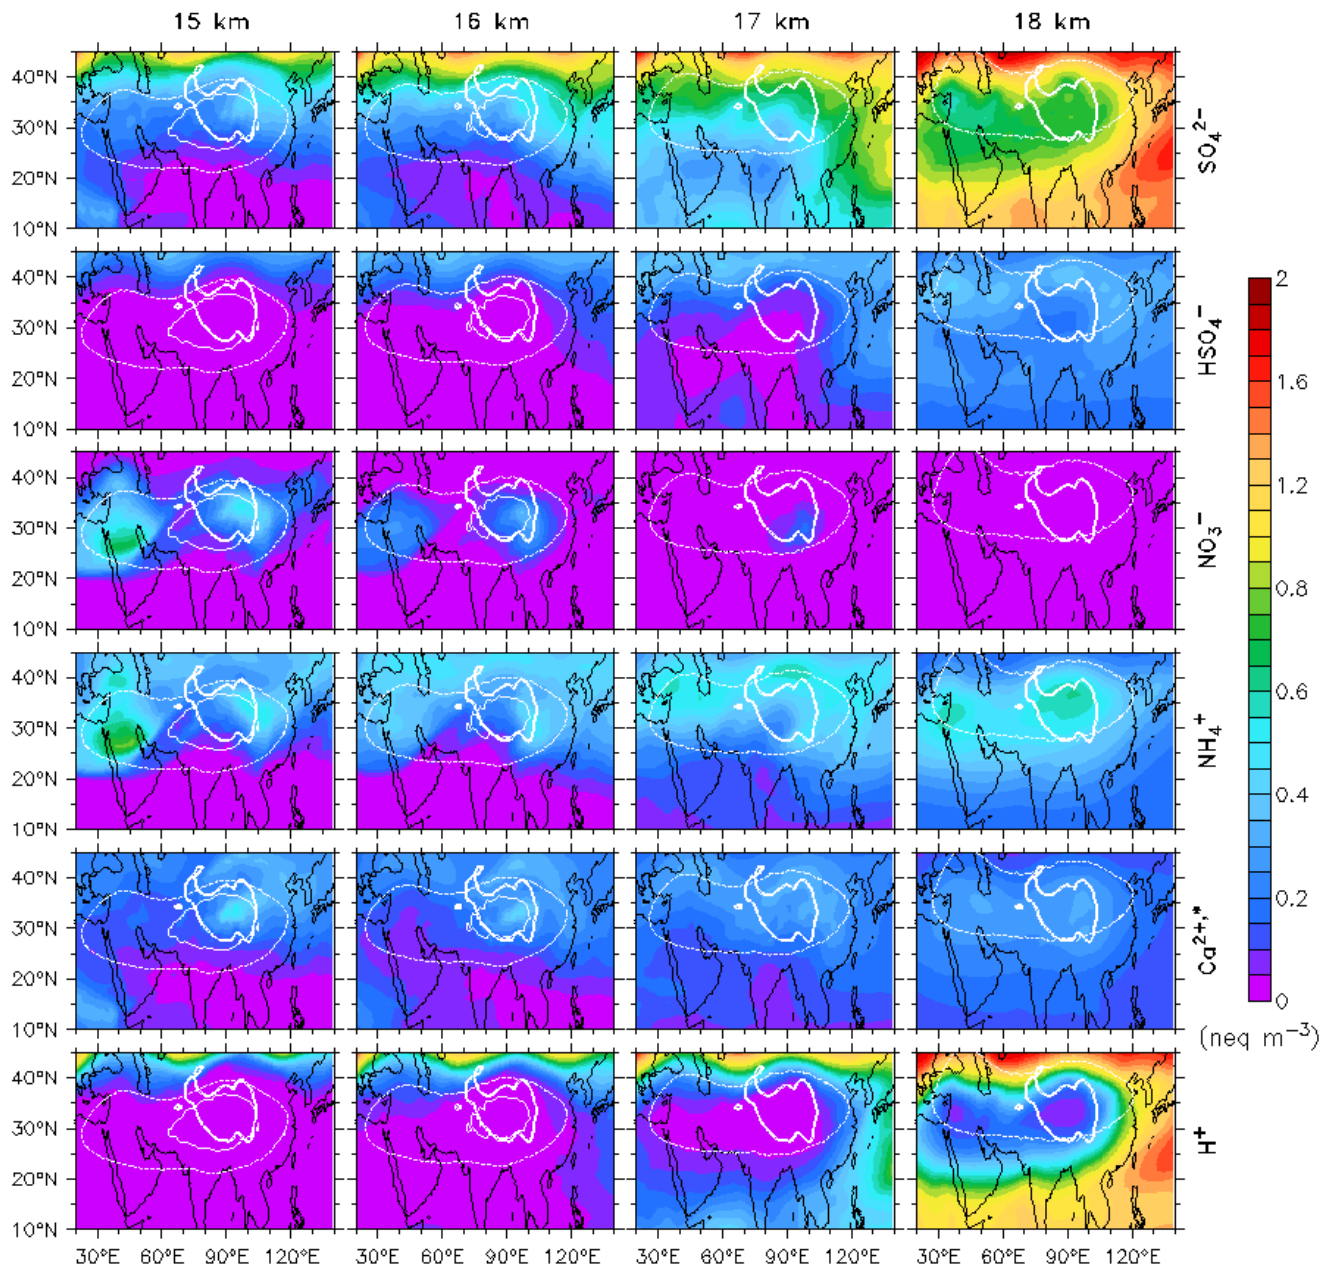

**Figure S7.** Same as Fig. 8, but for the year 2010.

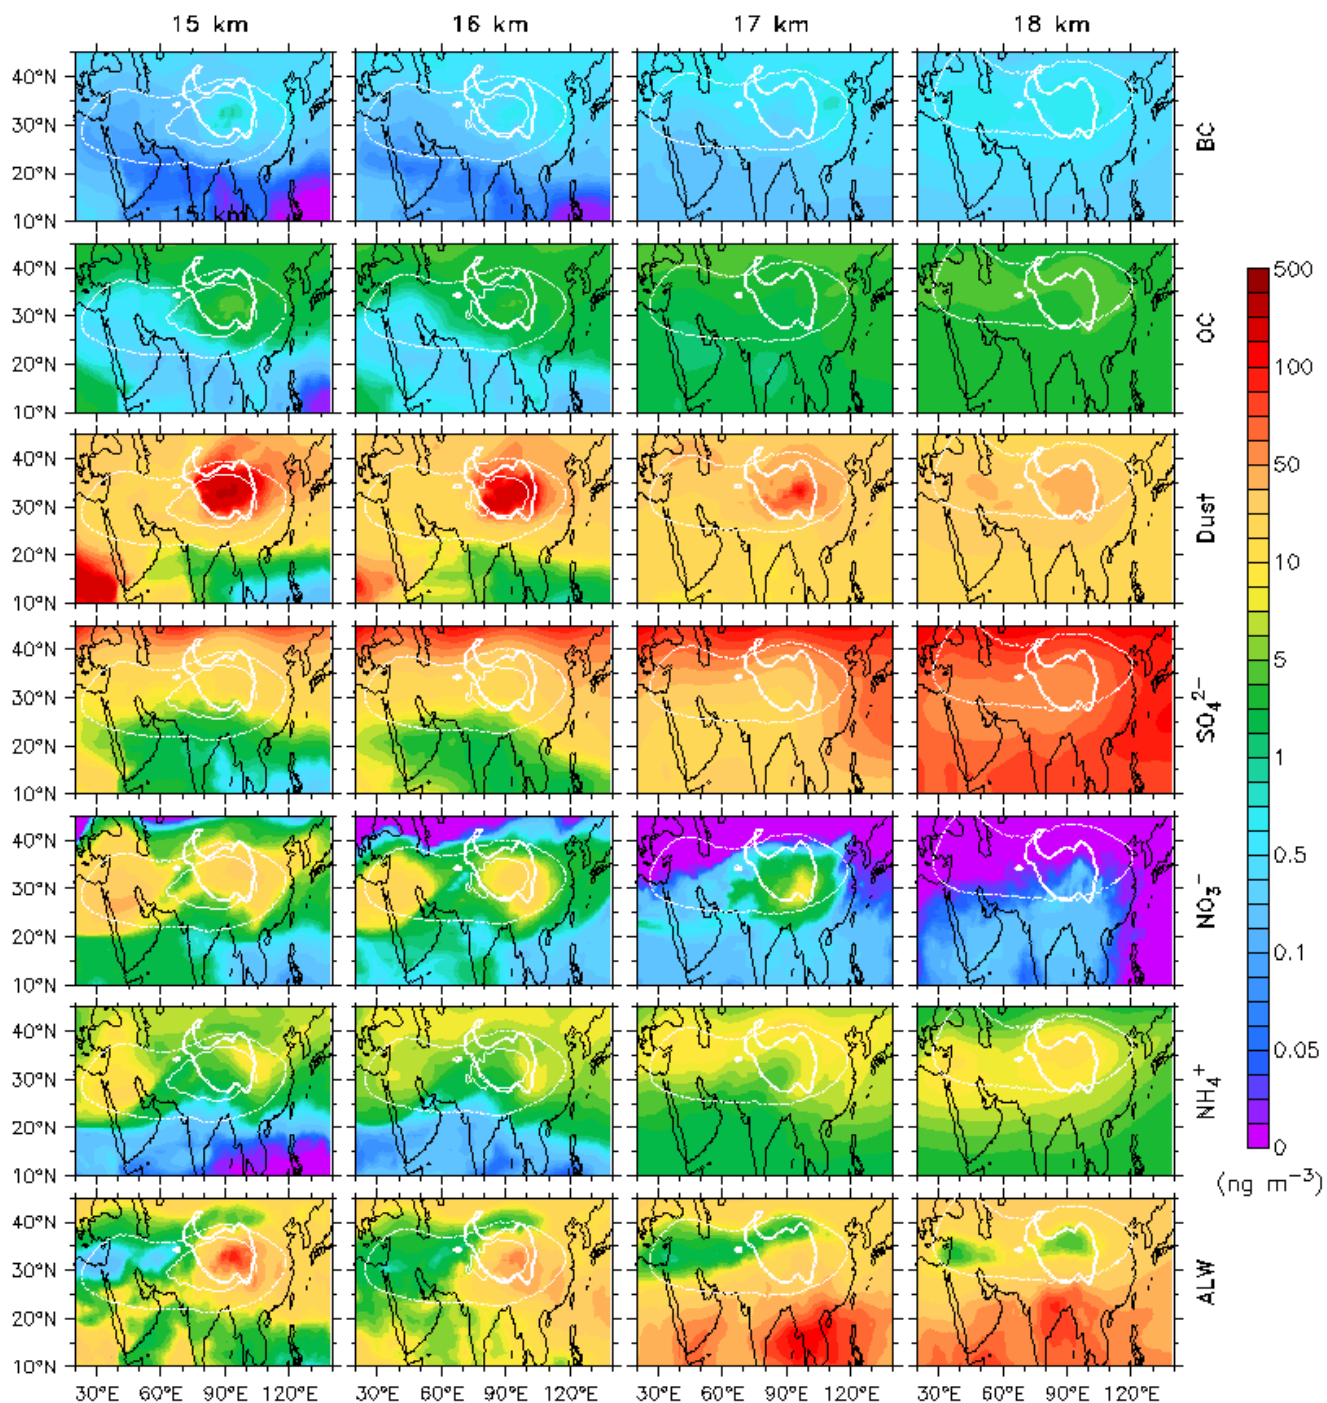

**Figure S8.** Same as Fig. 10, but for the year 2010.



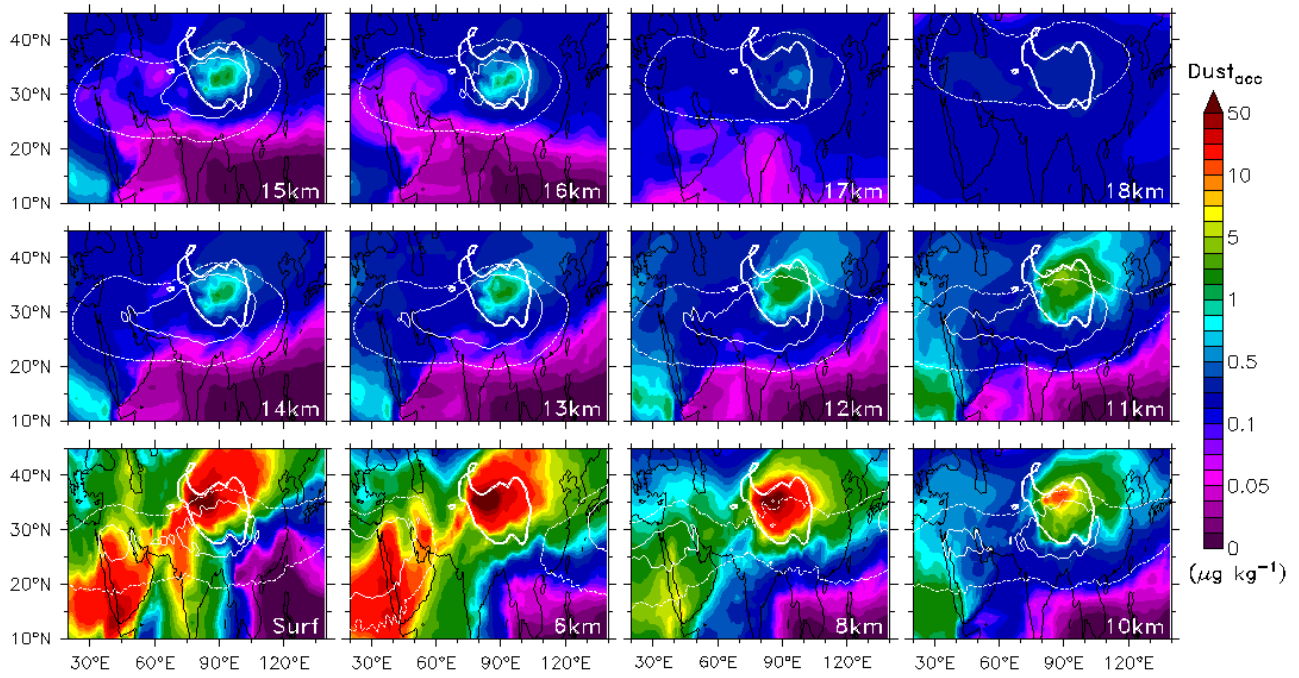

**Figure S9.** Same as Fig. 12, but for the year 2010.

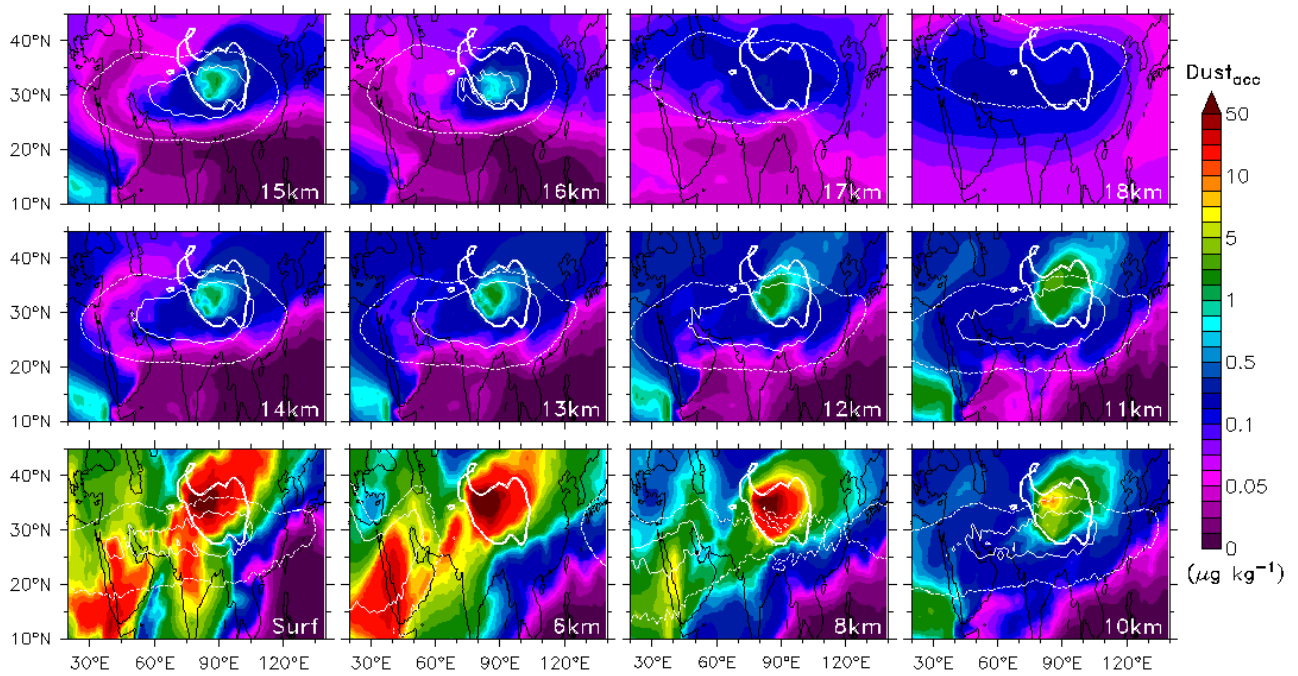

**Figure S10.** Same as Fig. 12, but for the year 2012.
